# Supplementary figures and images for: Subfunctionalization of phytochrome B1/B2 leads to differential auxin and photosynthetic responses
Source: PubMed Central journal article supplement — Plant Direct. 2020 Feb 28;4(2):e00205. doi: 10.1002/pld3.205 (PMC7047017; doi:10.1002/pld3.205), 2020-02-28

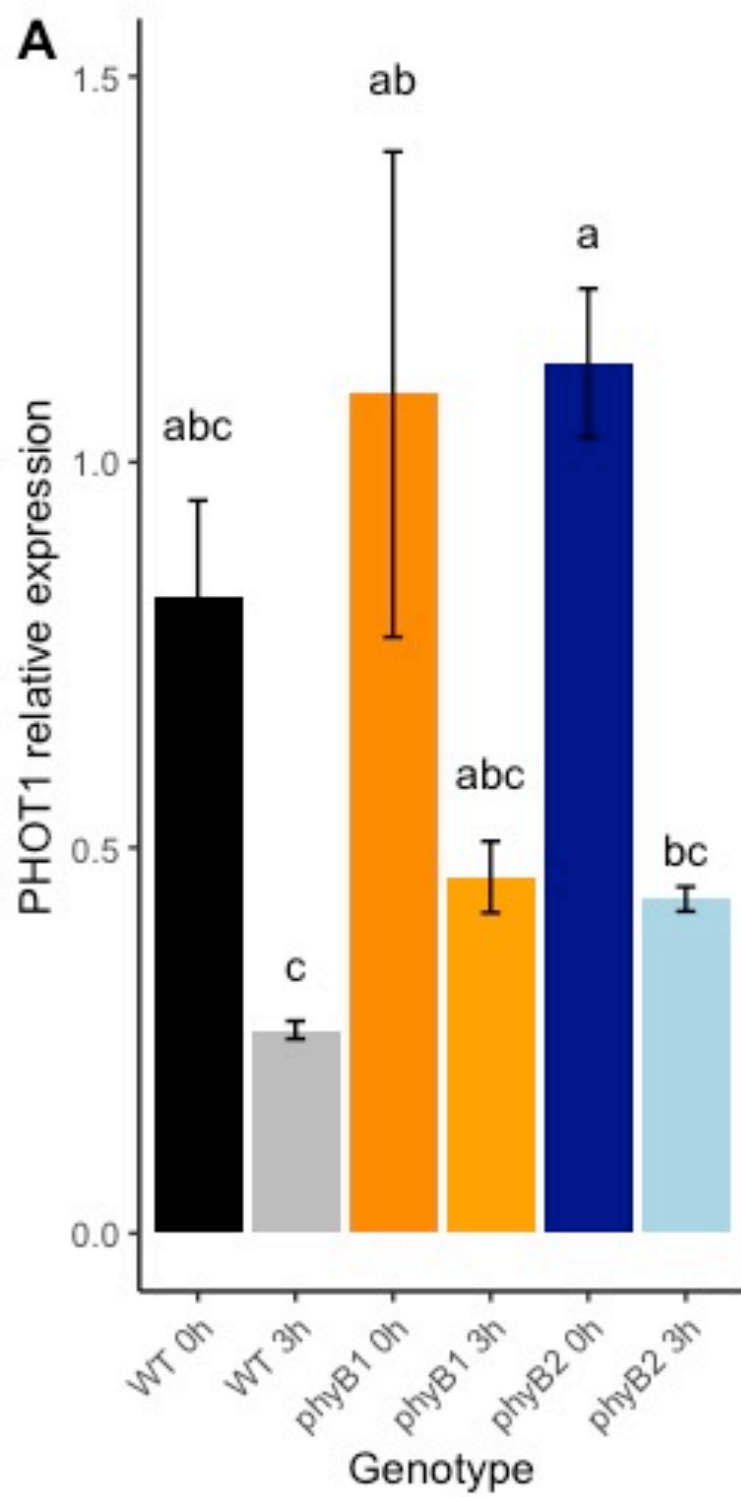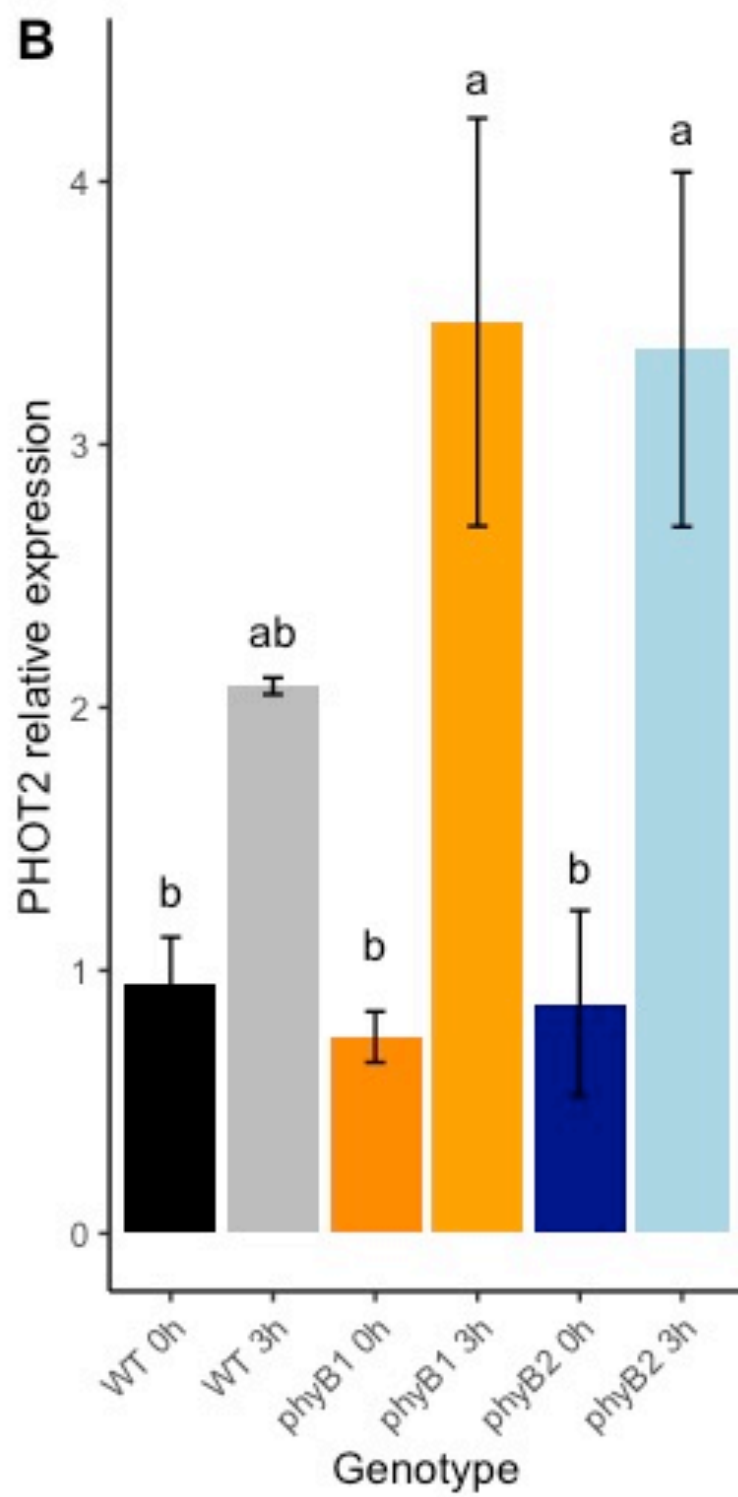

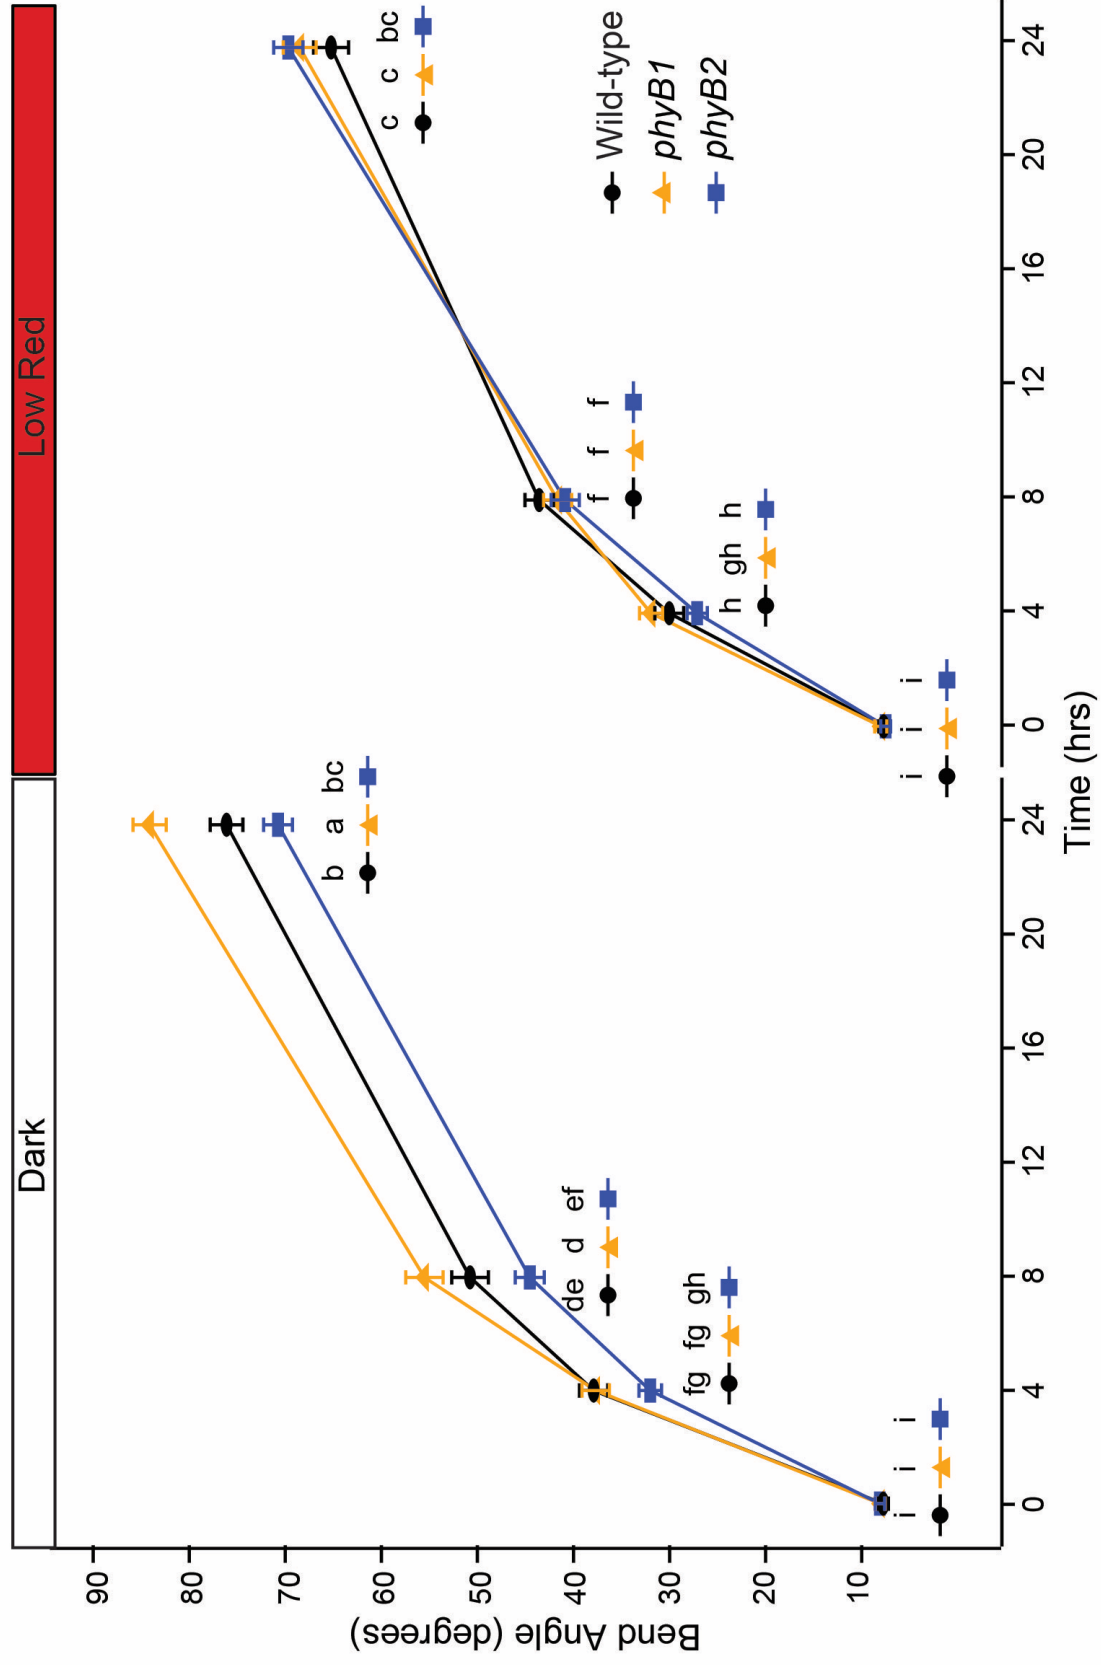

Supplement: PLD3-4-e00205-s001.pdf [file PLD3-4-e00205-s001.pdf]
